# Supplementary material for: Morphological and DNA sequence data uncover a new millipede species in the Thyropygus opinatus subgroup and assign T. peninsularis to this subgroup (Diplopoda: Spirostreptida: Harpagophoridae)
Source: PeerJ. 2025 Jun 6;13:e19277. doi: 10.7717/peerj.19277 (PMC12147765; doi:10.7717/peerj.19277)
Supplement: Supplemental Information 5 [file peerj-13-19277-s005.xlsx]

## Sheet: MatrixOutput
		1	2	3	4	5	6	7	8	9	10	11	12	13	14	15	16	17	18	19	20	21	22	23	24	25	26	27	28	29	30	31	32	33	34	35	36	37	38	39	40	41	42	43	44	45	46	47	48
1	Anurostreptus barthelemyae Tlb
2	Anurostreptus sculptus Pl	0.0862423
3	Armatostreptus armatus Tpp	0.11499	0.12115
4	Heptischius lactuca Us	0.125257	0.123203	0.0965092
5	Thyropygus allevatus Bb	0.141684	0.13347	0.141684	0.151951
6	Thyropygus allevatus Bk	0.141684	0.13347	0.141684	0.151951	0
7	Thyropygus bearti Ks	0.143737	0.13347	0.156057	0.151951	0.102669	0.102669
8	Thyropygus bispinispatula Kb	0.129363	0.13963	0.143737	0.149897	0.0944559	0.0944559	0.0533881
9	Thyropygus bispinus Tm	0.137577	0.135524	0.13963	0.145791	0.10883	0.10883	0.0759754	0.0718686
10	Thyropygus brachyacanthus Sk	0.149897	0.143737	0.143737	0.156057	0.104723	0.104723	0.0533881	0.0657084	0.0862423
11	Thyropygus cimi Nws1	0.154004	0.135524	0.160164	0.154004	0.100616	0.100616	0.0287474	0.0574949	0.0759754	0.063655
12	Thyropygus cristagalli Yn	0.149897	0.13963	0.158111	0.158111	0.10883	0.10883	0.036961	0.0595483	0.0821355	0.0472279	0.0390144
13	Thyropygus culter Nr	0.145791	0.135524	0.151951	0.156057	0.0944559	0.0944559	0.0287474	0.0492813	0.0657084	0.0554415	0.0246407	0.0390144
14	Thyropygus demangei Cm	0.13963	0.131417	0.158111	0.147844	0.0924025	0.0924025	0.026694	0.0513347	0.0718686	0.0616016	0.0143737	0.036961	0.0225873
15	Thyropygus enghoffi Kl	0.147844	0.141684	0.154004	0.151951	0.112936	0.112936	0.0308008	0.063655	0.0821355	0.0492813	0.0390144	0.0123203	0.0390144	0.036961
16	Thyropygus foliaceus Kj	0.135524	0.137577	0.149897	0.137577	0.0985626	0.0985626	0.0985626	0.0821355	0.10883	0.110883	0.0965092	0.0965092	0.0944559	0.0924025	0.100616
17	Thyropygus forceps Nws2	0.143737	0.135524	0.145791	0.137577	0.0985626	0.0985626	0.073922	0.0677618	0.0698152	0.0841889	0.073922	0.0800821	0.0677618	0.073922	0.0862423	0.0924025
18	Thyropygus induratus Ldn	0.143737	0.125257	0.149897	0.145791	0.0800821	0.0800821	0.0841889	0.0903491	0.0944559	0.102669	0.0862423	0.0985626	0.0841889	0.0841889	0.0965092	0.0965092	0.0903491
19	Thyropygus induratus Nru	0.143737	0.129363	0.145791	0.151951	0.0780287	0.0780287	0.0882957	0.0903491	0.0944559	0.0985626	0.0924025	0.102669	0.0882957	0.0882957	0.100616	0.0924025	0.0944559	0.0102669
20	Thyropygus induratus Ps	0.143737	0.12731	0.147844	0.149897	0.0780287	0.0780287	0.0821355	0.0882957	0.0965092	0.0965092	0.0862423	0.0965092	0.0821355	0.0821355	0.0944559	0.0965092	0.0924025	0.0102669	0.00821355
21	Thyropygus induratus Pw	0.135524	0.12731	0.141684	0.131417	0.0821355	0.0821355	0.0903491	0.0903491	0.0924025	0.0965092	0.0944559	0.0882957	0.0924025	0.0862423	0.0924025	0.0472279	0.0862423	0.0841889	0.0800821	0.0841889
22	Thyropygus induratus Ssk	0.141684	0.125257	0.141684	0.147844	0.0718686	0.0718686	0.0821355	0.0841889	0.0924025	0.0924025	0.0841889	0.0965092	0.0821355	0.0821355	0.0944559	0.0944559	0.0882957	0.0102669	0.00821355	0.0123203	0.0821355
23	Thyropygus induratus Tt	0.137577	0.12731	0.137577	0.141684	0.0759754	0.0759754	0.0821355	0.0841889	0.0882957	0.0924025	0.0862423	0.0965092	0.0821355	0.0821355	0.0944559	0.0903491	0.0882957	0.0164271	0.0102669	0.0143737	0.0780287	0.0102669
24	Thyropygus inflexus Kk	0.141684	0.135524	0.145791	0.13963	0.0903491	0.0903491	0.0595483	0.0677618	0.0574949	0.0759754	0.0616016	0.0616016	0.0595483	0.0574949	0.063655	0.0882957	0.063655	0.0841889	0.0862423	0.0841889	0.0841889	0.0841889	0.0759754
25	Thyropygus jarukchusri Np	0.13347	0.129363	0.131417	0.123203	0.106776	0.106776	0.0862423	0.0924025	0.100616	0.110883	0.0965092	0.0924025	0.0944559	0.0924025	0.0985626	0.0533881	0.0882957	0.100616	0.100616	0.100616	0.0492813	0.102669	0.0944559	0.0800821
26	Thyropygus laterolobatus Ry	0.137577	0.131417	0.13347	0.143737	0.0718686	0.0718686	0.0841889	0.0862423	0.0965092	0.0944559	0.0800821	0.0965092	0.0821355	0.0780287	0.0985626	0.0985626	0.0965092	0.0349076	0.036961	0.0328542	0.0841889	0.0328542	0.0390144	0.0924025	0.100616
27	Thyropygus loxia Ty	0.13347	0.13963	0.143737	0.151951	0.0944559	0.0944559	0.063655	0.0554415	0.0780287	0.0759754	0.0616016	0.0800821	0.0595483	0.0616016	0.0841889	0.0965092	0.0759754	0.0985626	0.100616	0.102669	0.0985626	0.0944559	0.0944559	0.0616016	0.0985626	0.0903491
28	Thyropygus macrosiamensis Kj	0.13963	0.125257	0.137577	0.143737	0.0800821	0.0800821	0.0862423	0.0903491	0.102669	0.0924025	0.0924025	0.100616	0.0903491	0.0862423	0.0985626	0.0924025	0.0903491	0.0492813	0.0451745	0.0492813	0.0882957	0.0431211	0.0472279	0.0780287	0.0882957	0.0616016	0.0862423
29	Thyropygus mesocristatus Ss	0.145791	0.137577	0.147844	0.143737	0.0985626	0.0985626	0.0287474	0.0451745	0.0841889	0.0472279	0.0287474	0.0308008	0.0246407	0.0308008	0.0308008	0.0965092	0.0780287	0.102669	0.106776	0.100616	0.0985626	0.100616	0.100616	0.0616016	0.0924025	0.0944559	0.0616016	0.0882957
30	Thyropygus navychula KSR	0.145791	0.147844	0.154004	0.158111	0.0944559	0.0944559	0.0595483	0.0492813	0.0841889	0.0800821	0.0616016	0.0677618	0.0595483	0.0616016	0.0718686	0.10883	0.0718686	0.106776	0.110883	0.10883	0.106776	0.104723	0.104723	0.0595483	0.104723	0.0985626	0.063655	0.100616	0.0492813
31	Thyropygus opinatus Arw	0.131417	0.141684	0.13347	0.141684	0.0903491	0.0903491	0.0616016	0.0492813	0.073922	0.0657084	0.0677618	0.0698152	0.0616016	0.063655	0.0698152	0.100616	0.0718686	0.0985626	0.100616	0.0985626	0.0924025	0.0944559	0.0903491	0.0595483	0.0965092	0.0882957	0.0554415	0.0924025	0.0595483	0.0410678
32	Thyropygus payamense sp. nov. KPYR1	0.147844	0.13963	0.154004	0.158111	0.112936	0.112936	0.036961	0.0616016	0.0759754	0.0451745	0.0451745	0.0143737	0.0410678	0.0431211	0.0184805	0.106776	0.0821355	0.104723	0.10883	0.102669	0.0944559	0.102669	0.102669	0.063655	0.0985626	0.0965092	0.0780287	0.102669	0.0328542	0.0657084	0.0677618
33	Thyropygus payamense sp. nov. KPYR2	0.147844	0.13963	0.154004	0.158111	0.112936	0.112936	0.036961	0.0616016	0.0759754	0.0451745	0.0451745	0.0143737	0.0410678	0.0431211	0.0184805	0.106776	0.0821355	0.104723	0.10883	0.102669	0.0944559	0.102669	0.102669	0.063655	0.0985626	0.0965092	0.0780287	0.102669	0.0328542	0.0657084	0.0677618	0
34	Thyropygus peninsularis Wm	0.147844	0.13963	0.156057	0.154004	0.11499	0.11499	0.0328542	0.0616016	0.0759754	0.0451745	0.0410678	0.0143737	0.0410678	0.0431211	0.0143737	0.100616	0.0759754	0.0985626	0.102669	0.0965092	0.0924025	0.0965092	0.0965092	0.063655	0.0924025	0.100616	0.0780287	0.0965092	0.0328542	0.0698152	0.0718686	0.0164271	0.0164271
35	Thyropygus planispina Tsk2	0.149897	0.13963	0.158111	0.158111	0.10883	0.10883	0.036961	0.0595483	0.0821355	0.0472279	0.0390144	0.00410678	0.0390144	0.036961	0.0123203	0.0965092	0.0800821	0.0985626	0.102669	0.0965092	0.0882957	0.0965092	0.0965092	0.0616016	0.0924025	0.0965092	0.0800821	0.100616	0.0308008	0.0677618	0.0698152	0.0143737	0.0143737	0.0143737
36	Thyropygus quadricuspis Hy	0.143737	0.135524	0.158111	0.149897	0.0965092	0.0965092	0.0246407	0.0554415	0.0718686	0.0616016	0.0184805	0.0410678	0.0184805	0.0123203	0.036961	0.0965092	0.073922	0.0862423	0.0903491	0.0841889	0.0903491	0.0841889	0.0841889	0.0657084	0.0924025	0.0800821	0.0657084	0.0924025	0.0308008	0.0616016	0.0677618	0.0431211	0.0431211	0.0390144	0.0410678
37	Thyropygus quietus Cdv	0.145791	0.13347	0.147844	0.143737	0.0800821	0.0800821	0.0924025	0.0862423	0.0985626	0.102669	0.0965092	0.106776	0.0882957	0.0924025	0.104723	0.0882957	0.0965092	0.0328542	0.026694	0.026694	0.0800821	0.026694	0.0246407	0.0903491	0.0985626	0.0472279	0.100616	0.0574949	0.106776	0.110883	0.100616	0.112936	0.112936	0.102669	0.106776	0.0924025
38	Thyropygus resimus Kc	0.145791	0.13963	0.13963	0.149897	0.0780287	0.0780287	0.0924025	0.0924025	0.102669	0.0903491	0.0882957	0.0903491	0.0800821	0.0841889	0.0944559	0.102669	0.0800821	0.0554415	0.0554415	0.0513347	0.0882957	0.0513347	0.0533881	0.0903491	0.102669	0.0574949	0.0985626	0.0513347	0.0903491	0.104723	0.0944559	0.0985626	0.0985626	0.0965092	0.0903491	0.0841889	0.0657084
39	Thyropygus resimus Ksp	0.143737	0.137577	0.13963	0.149897	0.0759754	0.0759754	0.0903491	0.0903491	0.104723	0.0882957	0.0903491	0.0882957	0.0780287	0.0862423	0.0924025	0.100616	0.0780287	0.0533881	0.0533881	0.0492813	0.0862423	0.0492813	0.0513347	0.0882957	0.100616	0.0595483	0.0965092	0.0492813	0.0882957	0.102669	0.0924025	0.0965092	0.0965092	0.0944559	0.0882957	0.0862423	0.063655	0.00205339
40	Thyropygus resimus Ntp	0.143737	0.137577	0.13963	0.149897	0.0759754	0.0759754	0.0903491	0.0903491	0.104723	0.0882957	0.0903491	0.0882957	0.0780287	0.0862423	0.0924025	0.100616	0.0780287	0.0533881	0.0533881	0.0492813	0.0862423	0.0492813	0.0513347	0.0882957	0.100616	0.0595483	0.0965092	0.0492813	0.0882957	0.102669	0.0924025	0.0965092	0.0965092	0.0944559	0.0882957	0.0862423	0.063655	0.00205339	0
41	Thyropygus resimus Pk	0.147844	0.135524	0.143737	0.145791	0.0780287	0.0780287	0.0924025	0.0821355	0.100616	0.0965092	0.0903491	0.0924025	0.0780287	0.0862423	0.0924025	0.0862423	0.0862423	0.0431211	0.0410678	0.0410678	0.0903491	0.0410678	0.0390144	0.0821355	0.0924025	0.063655	0.0924025	0.0431211	0.0882957	0.104723	0.0903491	0.0965092	0.0965092	0.0944559	0.0924025	0.0821355	0.0554415	0.0287474	0.026694	0.026694
42	Thyropygus resimus Pnk	0.147844	0.135524	0.143737	0.145791	0.0780287	0.0780287	0.0924025	0.0821355	0.100616	0.0965092	0.0903491	0.0924025	0.0780287	0.0862423	0.0924025	0.0862423	0.0862423	0.0431211	0.0410678	0.0410678	0.0903491	0.0410678	0.0390144	0.0821355	0.0924025	0.063655	0.0924025	0.0431211	0.0882957	0.104723	0.0903491	0.0965092	0.0965092	0.0944559	0.0924025	0.0821355	0.0554415	0.0287474	0.026694	0.026694	0
43	Thyropygus resimus Pp	0.13963	0.13347	0.131417	0.135524	0.0780287	0.0780287	0.0924025	0.0780287	0.0965092	0.0924025	0.0862423	0.0924025	0.0780287	0.0821355	0.0924025	0.0903491	0.0821355	0.0472279	0.0451745	0.0410678	0.0862423	0.0451745	0.0431211	0.0821355	0.0882957	0.0513347	0.0965092	0.0410678	0.0841889	0.100616	0.0862423	0.0965092	0.0965092	0.0944559	0.0924025	0.0780287	0.0574949	0.0246407	0.026694	0.026694	0.0164271	0.0164271
44	Thyropygus resimus Wnt	0.143737	0.137577	0.13963	0.149897	0.0759754	0.0759754	0.0903491	0.0903491	0.104723	0.0882957	0.0903491	0.0882957	0.0780287	0.0862423	0.0924025	0.100616	0.0780287	0.0533881	0.0533881	0.0492813	0.0862423	0.0492813	0.0513347	0.0882957	0.100616	0.0595483	0.0965092	0.0492813	0.0882957	0.102669	0.0924025	0.0965092	0.0965092	0.0944559	0.0882957	0.0862423	0.063655	0.00205339	0	0	0.026694	0.026694	0.026694
45	Thyropygus richardhoffmani TCH	0.145791	0.131417	0.154004	0.154004	0.102669	0.102669	0.0308008	0.0595483	0.073922	0.0677618	0.0184805	0.0410678	0.0308008	0.0205339	0.0451745	0.0903491	0.0677618	0.0903491	0.0944559	0.0882957	0.0882957	0.0882957	0.0882957	0.0616016	0.0903491	0.0841889	0.0677618	0.0882957	0.0349076	0.0595483	0.0657084	0.0472279	0.0472279	0.0431211	0.0410678	0.0246407	0.0944559	0.0903491	0.0924025	0.0924025	0.0924025	0.0924025	0.0882957	0.0924025
46	Thyropygus siamensis Sa	0.137577	0.129363	0.149897	0.141684	0.0924025	0.0924025	0.0965092	0.100616	0.106776	0.106776	0.100616	0.106776	0.0882957	0.0965092	0.104723	0.0903491	0.0965092	0.0574949	0.0554415	0.0472279	0.0944559	0.0554415	0.0451745	0.0924025	0.0965092	0.0677618	0.102669	0.0595483	0.102669	0.125257	0.100616	0.112936	0.112936	0.106776	0.106776	0.0944559	0.0595483	0.0513347	0.0492813	0.0492813	0.0410678	0.0410678	0.0410678	0.0492813	0.102669
47	Thyropygus sutchariti KCP	0.12115	0.143737	0.135524	0.137577	0.100616	0.100616	0.073922	0.0595483	0.0903491	0.0882957	0.0780287	0.0841889	0.0800821	0.0698152	0.0841889	0.104723	0.0841889	0.100616	0.102669	0.100616	0.0965092	0.0965092	0.0924025	0.0759754	0.0965092	0.0841889	0.0554415	0.0903491	0.073922	0.0677618	0.0574949	0.0821355	0.0821355	0.0862423	0.0841889	0.073922	0.0965092	0.0985626	0.0965092	0.0965092	0.0965092	0.0965092	0.0882957	0.0965092	0.0718686	0.10883
48	Thyropygus uncinatus Kdb	0.12731	0.123203	0.13963	0.12731	0.0862423	0.0862423	0.102669	0.102669	0.102669	0.10883	0.106776	0.104723	0.102669	0.102669	0.102669	0.0903491	0.0862423	0.063655	0.0595483	0.0595483	0.0944559	0.0595483	0.0492813	0.0841889	0.0924025	0.073922	0.100616	0.0513347	0.104723	0.11499	0.102669	0.106776	0.106776	0.104723	0.104723	0.10883	0.0657084	0.0595483	0.0574949	0.0574949	0.0492813	0.0492813	0.0492813	0.0574949	0.10883	0.036961	0.106776
49	Thyropygus uncinatus Pj	0.137577	0.125257	0.151951	0.137577	0.0862423	0.0862423	0.10883	0.112936	0.110883	0.123203	0.112936	0.11499	0.10883	0.10883	0.112936	0.0965092	0.0944559	0.0698152	0.0698152	0.0657084	0.104723	0.0698152	0.0595483	0.0882957	0.0985626	0.0800821	0.104723	0.0574949	0.110883	0.119097	0.106776	0.117043	0.117043	0.11499	0.11499	0.11499	0.0759754	0.0657084	0.063655	0.063655	0.0513347	0.0513347	0.0554415	0.063655	0.11499	0.0431211	0.11499	0.0143737
50	Thyropygus uncinatus Pks	0.141684	0.13347	0.151951	0.131417	0.0780287	0.0780287	0.102669	0.0965092	0.10883	0.117043	0.100616	0.106776	0.102669	0.0965092	0.10883	0.0841889	0.100616	0.0677618	0.063655	0.063655	0.0924025	0.063655	0.0533881	0.0759754	0.0924025	0.0759754	0.0965092	0.0554415	0.100616	0.102669	0.0944559	0.110883	0.110883	0.110883	0.106776	0.102669	0.0657084	0.0554415	0.0533881	0.0533881	0.0410678	0.0410678	0.0533881	0.0533881	0.102669	0.0451745	0.102669	0.0308008
51	Thyropygus uncinatus Pn	0.141684	0.129363	0.145791	0.129363	0.0780287	0.0780287	0.104723	0.0985626	0.0985626	0.11499	0.100616	0.112936	0.102669	0.0985626	0.11499	0.0821355	0.0903491	0.0657084	0.0616016	0.0657084	0.0821355	0.0616016	0.0554415	0.0821355	0.0862423	0.0698152	0.0985626	0.0533881	0.106776	0.10883	0.0965092	0.117043	0.117043	0.117043	0.112936	0.100616	0.0698152	0.0574949	0.0554415	0.0554415	0.0472279	0.0472279	0.0513347	0.0554415	0.104723	0.0431211	0.100616	0.0328542
52	Thyropygus uncinatus Ps	0.13963	0.12731	0.154004	0.13963	0.0903491	0.0903491	0.10883	0.10883	0.106776	0.123203	0.10883	0.110883	0.104723	0.104723	0.10883	0.0924025	0.0944559	0.0657084	0.0657084	0.0616016	0.100616	0.0657084	0.0554415	0.0924025	0.0985626	0.0780287	0.10883	0.0574949	0.110883	0.123203	0.110883	0.117043	0.117043	0.110883	0.110883	0.110883	0.0718686	0.0616016	0.0595483	0.0595483	0.0472279	0.0472279	0.0513347	0.0595483	0.110883	0.0390144	0.11499	0.0143737
53	Thyropygus uncinatus Rcb	0.129363	0.123203	0.141684	0.129363	0.0882957	0.0882957	0.104723	0.104723	0.104723	0.110883	0.10883	0.106776	0.104723	0.104723	0.104723	0.0924025	0.0882957	0.0657084	0.0616016	0.0616016	0.0965092	0.0616016	0.0513347	0.0862423	0.0944559	0.0759754	0.102669	0.0533881	0.106776	0.117043	0.104723	0.10883	0.10883	0.106776	0.106776	0.110883	0.0677618	0.0616016	0.0595483	0.0595483	0.0513347	0.0513347	0.0513347	0.0595483	0.110883	0.0390144	0.10883	0.00205339
54	Thyropygus uncinatus Sc	0.137577	0.123203	0.154004	0.137577	0.0924025	0.0924025	0.10883	0.112936	0.10883	0.123203	0.110883	0.11499	0.10883	0.10883	0.112936	0.0985626	0.0965092	0.0698152	0.073922	0.0657084	0.106776	0.0698152	0.063655	0.0903491	0.100616	0.0800821	0.106776	0.0595483	0.110883	0.12115	0.10883	0.117043	0.117043	0.11499	0.11499	0.11499	0.0800821	0.0698152	0.0677618	0.0677618	0.0554415	0.0554415	0.0595483	0.0677618	0.11499	0.0431211	0.117043	0.0184805
55	Thyropygus uncinatus Sm	0.131417	0.125257	0.143737	0.129363	0.0841889	0.0841889	0.100616	0.100616	0.104723	0.11499	0.104723	0.106776	0.100616	0.100616	0.104723	0.0882957	0.0882957	0.0657084	0.0616016	0.0616016	0.0924025	0.0616016	0.0513347	0.0821355	0.0903491	0.0759754	0.0985626	0.0533881	0.102669	0.112936	0.100616	0.10883	0.10883	0.106776	0.106776	0.106776	0.0677618	0.0616016	0.0595483	0.0595483	0.0513347	0.0513347	0.0513347	0.0595483	0.106776	0.0390144	0.104723	0.00616016
56	Thyropygus uncinatus Sn	0.131417	0.12115	0.143737	0.135524	0.0841889	0.0841889	0.104723	0.104723	0.104723	0.11499	0.10883	0.110883	0.104723	0.104723	0.10883	0.0882957	0.0882957	0.0677618	0.063655	0.063655	0.0944559	0.063655	0.0533881	0.0821355	0.0965092	0.0780287	0.0985626	0.0554415	0.106776	0.112936	0.100616	0.112936	0.112936	0.110883	0.110883	0.110883	0.0657084	0.063655	0.0616016	0.0616016	0.0492813	0.0492813	0.0533881	0.0616016	0.110883	0.0451745	0.10883	0.0123203
57	Thyropygus undulatus Pb2	0.149897	0.13963	0.158111	0.158111	0.10883	0.10883	0.036961	0.0595483	0.0821355	0.0472279	0.0390144	0.00410678	0.0390144	0.036961	0.0123203	0.0965092	0.0800821	0.0985626	0.102669	0.0965092	0.0882957	0.0965092	0.0965092	0.0616016	0.0924025	0.0965092	0.0800821	0.100616	0.0308008	0.0677618	0.0698152	0.0143737	0.0143737	0.0143737	0	0.0410678	0.106776	0.0903491	0.0882957	0.0882957	0.0924025	0.0924025	0.0924025	0.0882957	0.0410678	0.106776	0.0841889	0.104723
58	Thyropygus ursus LTK	0.143737	0.135524	0.162218	0.151951	0.0924025	0.0924025	0.026694	0.0554415	0.0800821	0.0657084	0.0143737	0.0410678	0.0225873	0.0123203	0.0410678	0.0965092	0.0780287	0.0882957	0.0924025	0.0862423	0.0944559	0.0862423	0.0862423	0.0657084	0.0924025	0.0841889	0.0616016	0.0903491	0.0308008	0.0616016	0.0677618	0.0472279	0.0472279	0.0431211	0.0410678	0.00821355	0.0944559	0.0841889	0.0862423	0.0862423	0.0862423	0.0862423	0.0821355	0.0862423	0.0246407	0.0965092	0.073922	0.106776
[truncated: 10 more columns]

## Sheet: Caption
Table. Estimates of Evolutionary Divergence between Sequences
The number of base differences per site from between sequences are shown. This analysis involved 58 nucleotide sequences. All ambiguous positions were removed for each sequence pair (pairwise deletion option). There were a total of 487 positions in the final dataset. Evolutionary analyses were conducted in MEGA11 [1]
1. Tamura K., Stecher G., and Kumar S. (2021). MEGA 11: Molecular Evolutionary Genetics Analysis Version 11. Molecular Biology and Evolution https://doi.org/10.1093/molbev/msab120.
Disclaimer: Although utmost care has been taken to ensure the correctness of the caption, the caption text is provided "as is" without any warranty of any kind. Authors advise the user to carefully check the caption prior to its use for any purpose and report any errors or problems to the authors immediately (www.megasoftware.net). In no event shall the authors and their employers be liable for a…
