# Supplementary material for: Morphological and DNA sequence data uncover a new millipede species in the Thyropygus opinatus subgroup and assign T. peninsularis to this subgroup (Diplopoda: Spirostreptida: Harpagophoridae)
Source: PeerJ. 2025 Jun 6;13:e19277. doi: 10.7717/peerj.19277 (PMC12147765; doi:10.7717/peerj.19277)
Supplement: Supplemental Information 6 [file peerj-13-19277-s006.xlsx]

## Sheet: MatrixOutput
		1	2	3	4	5	6	7	8	9	10	11	12	13	14	15	16	17	18	19	20	21	22	23	24	25	26	27	28	29	30	31	32	33	34	35	36	37	38	39	40	41	42	43	44	45	46	47	48
1	Anurostreptus barthelemyae Tlb
2	Anurostreptus sculptus Pl	0.123801
3	Armatostreptus armatus Tpp	0.152572	0.149956
4	Heptischius lactuca Us	0.164778	0.149085	0.129032
5	Thyropygus allevatus Bb	0.149085	0.155187	0.169137	0.170009
6	Thyropygus allevatus Bk	0.149956	0.156059	0.169137	0.168265	0.00174368
7	Thyropygus bearti Ks	0.170009	0.169137	0.169137	0.176112	0.137751	0.138622
8	Thyropygus bispinispatula Kb	0.163906	0.167393	0.177855	0.172624	0.125545	0.126417	0.097646
9	Thyropygus bispinus Tm	0.16129	0.153444	0.167393	0.168265	0.136879	0.137751	0.111595	0.109852
10	Thyropygus brachyacanthus Sk	0.176112	0.170881	0.170009	0.183958	0.140366	0.141238	0.0941587	0.108108	0.127289
11	Thyropygus cimi Nws1	0.178727	0.168265	0.170009	0.178727	0.142982	0.143854	0.043592	0.103749	0.109852	0.100262
12	Thyropygus cristagalli Yn	0.16565	0.172624	0.174368	0.179599	0.12816	0.129032	0.0880558	0.107236	0.129904	0.0793374	0.0932868
13	Thyropygus culter Nr	0.16565	0.170009	0.16129	0.178727	0.130776	0.131648	0.0505667	0.0967742	0.105493	0.0932868	0.0566696	0.0889276
14	Thyropygus demangei Cm	0.172624	0.174368	0.167393	0.179599	0.138622	0.139494	0.0462075	0.0967742	0.108108	0.100262	0.0331299	0.092415	0.0566696
15	Thyropygus enghoffi Kl	0.16129	0.163906	0.16565	0.164778	0.122929	0.123801	0.0767219	0.101133	0.117698	0.0775937	0.0854403	0.0313862	0.0854403	0.0880558
16	Thyropygus foliaceus Kj	0.172624	0.162162	0.176983	0.173496	0.127289	0.12816	0.122929	0.122929	0.135135	0.142982	0.123801	0.139494	0.125545	0.122058	0.129904
17	Thyropygus forceps Nws2	0.172624	0.16565	0.16565	0.155187	0.136879	0.137751	0.106364	0.106364	0.105493	0.127289	0.0993897	0.122929	0.105493	0.105493	0.11857	0.130776
18	Thyropygus induratus Ldn	0.152572	0.162162	0.168265	0.163906	0.111595	0.112467	0.114211	0.11857	0.126417	0.136007	0.114211	0.13252	0.111595	0.114211	0.125545	0.134263	0.129904
19	Thyropygus induratus Nru	0.157803	0.170881	0.168265	0.173496	0.115955	0.116827	0.122058	0.122929	0.129904	0.137751	0.119442	0.144725	0.113339	0.117698	0.13252	0.134263	0.131648	0.0374891
20	Thyropygus induratus Ps	0.158675	0.169137	0.171752	0.163034	0.115083	0.115955	0.115955	0.119442	0.133391	0.13252	0.115955	0.137751	0.108108	0.114211	0.125545	0.139494	0.133391	0.0383609	0.0244115
21	Thyropygus induratus Pw	0.156931	0.167393	0.16565	0.156931	0.116827	0.117698	0.126417	0.123801	0.131648	0.140366	0.122058	0.138622	0.120314	0.122058	0.12816	0.120314	0.12816	0.0688753	0.0540541	0.0531822
22	Thyropygus induratus Ssk	0.157803	0.163034	0.170009	0.166521	0.108108	0.10898	0.114211	0.112467	0.125545	0.122929	0.114211	0.12816	0.111595	0.114211	0.117698	0.133391	0.126417	0.0278989	0.043592	0.0418483	0.0723627
23	Thyropygus induratus Tt	0.155187	0.16565	0.163034	0.16565	0.111595	0.112467	0.120314	0.115955	0.127289	0.131648	0.11857	0.137751	0.111595	0.115083	0.125545	0.135135	0.129904	0.0401046	0.0174368	0.0226678	0.048823	0.0392328
24	Thyropygus inflexus Kk	0.162162	0.156059	0.163034	0.168265	0.129032	0.12816	0.100262	0.105493	0.0915432	0.114211	0.104621	0.115955	0.0950305	0.097646	0.112467	0.122929	0.101133	0.123801	0.12816	0.124673	0.129032	0.122058	0.121186
25	Thyropygus jarukchusri Np	0.166521	0.159547	0.163906	0.159547	0.125545	0.126417	0.121186	0.127289	0.129904	0.138622	0.129904	0.130776	0.125545	0.126417	0.119442	0.0863121	0.130776	0.124673	0.121186	0.122929	0.101133	0.115955	0.113339	0.123801
26	Thyropygus laterolobatus Ry	0.162162	0.158675	0.163906	0.166521	0.11857	0.119442	0.122058	0.122929	0.122058	0.136879	0.115955	0.136007	0.112467	0.116827	0.122929	0.130776	0.130776	0.0793374	0.0845684	0.0836966	0.109852	0.0845684	0.087184	0.12816	0.124673
27	Thyropygus loxia Ty	0.163034	0.154316	0.156931	0.16565	0.127289	0.12816	0.0889276	0.0950305	0.0985179	0.115955	0.0906713	0.115083	0.0941587	0.0906713	0.104621	0.125545	0.111595	0.12816	0.129032	0.12816	0.134263	0.123801	0.125545	0.102877	0.122058	0.117698
28	Thyropygus macrosiamensis Kj	0.157803	0.155187	0.167393	0.163034	0.115083	0.115955	0.109852	0.120314	0.120314	0.119442	0.108108	0.129032	0.115083	0.108108	0.117698	0.119442	0.122929	0.0897995	0.092415	0.0897995	0.112467	0.087184	0.0897995	0.114211	0.112467	0.0993897	0.11857
29	Thyropygus mesocristatus Ss	0.163906	0.167393	0.169137	0.172624	0.140366	0.141238	0.0418483	0.0967742	0.116827	0.0967742	0.0540541	0.0906713	0.0566696	0.0592851	0.0819529	0.127289	0.110724	0.123801	0.133391	0.125545	0.12816	0.123801	0.127289	0.102005	0.129904	0.129904	0.0985179	0.122058
30	Thyropygus navychula KSR	0.174368	0.159547	0.163906	0.174368	0.131648	0.13252	0.0915432	0.0950305	0.112467	0.110724	0.0932868	0.10898	0.0932868	0.0880558	0.106364	0.12816	0.109852	0.136879	0.139494	0.139494	0.143854	0.134263	0.136007	0.0950305	0.121186	0.12816	0.097646	0.122929	0.0985179
31	Thyropygus opinatus Arw	0.160418	0.16129	0.153444	0.162162	0.123801	0.124673	0.0897995	0.0889276	0.113339	0.105493	0.0993897	0.097646	0.092415	0.0967742	0.0906713	0.129032	0.103749	0.122058	0.127289	0.127289	0.129032	0.11857	0.116827	0.097646	0.121186	0.120314	0.0863121	0.114211	0.0906713	0.0662598
32	Thyropygus payamense sp. nov. KPYR1	0.171752	0.168265	0.170881	0.176112	0.134263	0.135135	0.07585	0.112467	0.10898	0.0802092	0.0784656	0.0592851	0.0845684	0.0802092	0.0566696	0.139494	0.115083	0.129904	0.138622	0.135135	0.133391	0.122929	0.131648	0.102005	0.11857	0.127289	0.0967742	0.11857	0.087184	0.101133	0.0950305
33	Thyropygus payamense sp. nov. KPYR2	0.170881	0.168265	0.170881	0.176112	0.13252	0.133391	0.07585	0.112467	0.108108	0.0784656	0.0802092	0.0575414	0.0836966	0.0819529	0.0549259	0.137751	0.115083	0.129032	0.139494	0.136007	0.134263	0.122058	0.13252	0.100262	0.116827	0.127289	0.0967742	0.117698	0.0854403	0.101133	0.0932868	0.00174368
34	Thyropygus peninsularis Wm	0.177855	0.176983	0.178727	0.178727	0.138622	0.139494	0.0810811	0.11857	0.116827	0.0741064	0.0819529	0.0636443	0.0828248	0.0854403	0.0601569	0.134263	0.117698	0.130776	0.136879	0.129904	0.13252	0.126417	0.131648	0.111595	0.126417	0.127289	0.112467	0.116827	0.0915432	0.108108	0.105493	0.0462075	0.0453357
35	Thyropygus planispina Tsk2	0.168265	0.170881	0.176112	0.178727	0.129032	0.129904	0.0880558	0.106364	0.125545	0.0793374	0.0915432	0.0104621	0.0915432	0.0906713	0.0322581	0.137751	0.127289	0.133391	0.145597	0.138622	0.139494	0.127289	0.138622	0.11857	0.129904	0.136879	0.113339	0.129904	0.0889276	0.110724	0.101133	0.0601569	0.0584133	0.0636443
36	Thyropygus quadricuspis Hy	0.173496	0.168265	0.170009	0.170881	0.136879	0.137751	0.0366173	0.097646	0.107236	0.0941587	0.027027	0.0906713	0.0496949	0.0252833	0.0819529	0.122929	0.102005	0.116827	0.119442	0.114211	0.123801	0.114211	0.116827	0.101133	0.122929	0.11857	0.0897995	0.107236	0.0505667	0.0897995	0.097646	0.0775937	0.0767219	0.0784656	0.0897995
37	Thyropygus quietus Cdv	0.156931	0.170881	0.172624	0.171752	0.117698	0.11857	0.121186	0.123801	0.123801	0.127289	0.120314	0.133391	0.116827	0.11857	0.129904	0.129904	0.134263	0.0645161	0.0619006	0.0636443	0.0932868	0.0619006	0.0636443	0.129032	0.125545	0.0836966	0.121186	0.0959024	0.137751	0.136879	0.127289	0.125545	0.126417	0.122929	0.134263	0.119442
38	Thyropygus resimus Kc	0.168265	0.155187	0.166521	0.163034	0.117698	0.11857	0.119442	0.116827	0.116827	0.129904	0.114211	0.130776	0.108108	0.113339	0.122058	0.120314	0.114211	0.0915432	0.0915432	0.0897995	0.109852	0.0880558	0.0915432	0.115083	0.115083	0.0880558	0.10898	0.0941587	0.11857	0.114211	0.116827	0.125545	0.123801	0.122929	0.129904	0.110724	0.0985179
39	Thyropygus resimus Ksp	0.168265	0.155187	0.16565	0.163034	0.117698	0.11857	0.119442	0.116827	0.11857	0.129904	0.114211	0.130776	0.108108	0.113339	0.122058	0.120314	0.113339	0.0915432	0.0915432	0.0897995	0.109852	0.0880558	0.0915432	0.115083	0.115083	0.0889276	0.107236	0.0941587	0.11857	0.112467	0.116827	0.125545	0.123801	0.122929	0.129904	0.110724	0.0985179	0.00174368
40	Thyropygus resimus Ntp	0.168265	0.155187	0.16565	0.163034	0.117698	0.11857	0.119442	0.116827	0.11857	0.129904	0.114211	0.130776	0.108108	0.113339	0.122058	0.120314	0.113339	0.0915432	0.0915432	0.0897995	0.109852	0.0880558	0.0915432	0.115083	0.115083	0.0889276	0.107236	0.0941587	0.11857	0.112467	0.116827	0.125545	0.123801	0.122929	0.129904	0.110724	0.0985179	0.00174368	0
41	Thyropygus resimus Pk	0.167393	0.156931	0.167393	0.16565	0.113339	0.113339	0.117698	0.114211	0.114211	0.127289	0.11857	0.129904	0.112467	0.113339	0.121186	0.119442	0.122058	0.0854403	0.097646	0.097646	0.116827	0.0854403	0.0932868	0.112467	0.121186	0.101133	0.108108	0.0836966	0.117698	0.115955	0.110724	0.121186	0.119442	0.125545	0.129904	0.10898	0.104621	0.0610288	0.0610288	0.0610288
42	Thyropygus resimus Pnk	0.16129	0.156059	0.168265	0.16565	0.109852	0.110724	0.110724	0.108108	0.112467	0.124673	0.107236	0.129032	0.113339	0.108108	0.117698	0.106364	0.119442	0.087184	0.0967742	0.0959024	0.115083	0.0863121	0.0932868	0.106364	0.111595	0.0993897	0.110724	0.0749782	0.111595	0.116827	0.113339	0.121186	0.119442	0.126417	0.127289	0.102877	0.102877	0.0671316	0.0671316	0.0671316	0.0287707
43	Thyropygus resimus Pp	0.162162	0.155187	0.16129	0.154316	0.110724	0.111595	0.123801	0.10898	0.111595	0.122058	0.122058	0.121186	0.109852	0.11857	0.111595	0.116827	0.10898	0.0906713	0.0985179	0.0932868	0.115083	0.087184	0.0967742	0.116827	0.109852	0.092415	0.117698	0.0793374	0.119442	0.112467	0.108108	0.125545	0.123801	0.129904	0.120314	0.114211	0.105493	0.0575414	0.0592851	0.0592851	0.0566696	0.0601569
44	Thyropygus resimus Wnt	0.16565	0.153444	0.168265	0.162162	0.116827	0.117698	0.119442	0.115955	0.11857	0.130776	0.115955	0.130776	0.108108	0.115083	0.122058	0.121186	0.113339	0.0897995	0.0897995	0.087184	0.108108	0.087184	0.0897995	0.115083	0.114211	0.0889276	0.10898	0.0915432	0.116827	0.114211	0.115083	0.125545	0.123801	0.123801	0.129904	0.112467	0.097646	0.00261552	0.00261552	0.00261552	0.0619006	0.0662598	0.0584133
45	Thyropygus richardhoffmani TCH	0.176112	0.166521	0.169137	0.17524	0.136879	0.137751	0.043592	0.103749	0.108108	0.104621	0.0348736	0.0959024	0.0584133	0.0374891	0.0897995	0.11857	0.105493	0.11857	0.122929	0.11857	0.125545	0.120314	0.121186	0.0993897	0.123801	0.115955	0.0941587	0.110724	0.0549259	0.0967742	0.101133	0.0810811	0.0828248	0.0863121	0.0941587	0.0331299	0.119442	0.116827	0.11857	0.11857	0.117698	0.111595	0.121186	0.11857
46	Thyropygus siamensis Sa	0.160418	0.152572	0.173496	0.157803	0.112467	0.113339	0.123801	0.125545	0.120314	0.129032	0.12816	0.127289	0.116827	0.127289	0.119442	0.121186	0.126417	0.0959024	0.101133	0.0941587	0.114211	0.0959024	0.0932868	0.122929	0.11857	0.097646	0.12816	0.0828248	0.13252	0.133391	0.125545	0.131648	0.129904	0.12816	0.125545	0.122929	0.0985179	0.0810811	0.0810811	0.0810811	0.0802092	0.07585	0.0732345	0.0810811	0.13252
47	Thyropygus sutchariti KCP	0.162162	0.162162	0.179599	0.17524	0.126417	0.127289	0.111595	0.104621	0.10898	0.123801	0.108108	0.123801	0.111595	0.104621	0.113339	0.134263	0.110724	0.135135	0.139494	0.142982	0.140366	0.129032	0.13252	0.102005	0.12816	0.13252	0.092415	0.112467	0.115955	0.102005	0.101133	0.100262	0.100262	0.114211	0.124673	0.106364	0.133391	0.121186	0.121186	0.121186	0.117698	0.110724	0.120314	0.121186	0.108108	0.122929
48	Thyropygus uncinatus Kdb	0.150828	0.146469	0.170881	0.156931	0.111595	0.112467	0.126417	0.122058	0.123801	0.137751	0.13252	0.139494	0.131648	0.134263	0.123801	0.123801	0.131648	0.097646	0.104621	0.0993897	0.116827	0.0950305	0.0967742	0.124673	0.127289	0.105493	0.117698	0.0845684	0.138622	0.136879	0.130776	0.13252	0.131648	0.126417	0.135135	0.134263	0.0959024	0.0959024	0.0959024	0.0959024	0.0880558	0.092415	0.0828248	0.0950305	0.135135	0.0775937	0.130776
49	Thyropygus uncinatus Pj	0.153444	0.153444	0.173496	0.156931	0.115955	0.116827	0.121186	0.124673	0.124673	0.140366	0.127289	0.136879	0.122058	0.127289	0.119442	0.122058	0.127289	0.103749	0.106364	0.101133	0.122058	0.104621	0.100262	0.113339	0.126417	0.104621	0.117698	0.0863121	0.135135	0.134263	0.122058	0.136007	0.135135	0.129904	0.136879	0.129904	0.0959024	0.092415	0.092415	0.092415	0.0932868	0.0897995	0.0863121	0.0915432	0.12816	0.0749782	0.136007	0.0366173
50	Thyropygus uncinatus Pks	0.157803	0.158675	0.170009	0.157803	0.115955	0.116827	0.124673	0.127289	0.13252	0.141238	0.125545	0.137751	0.126417	0.122929	0.127289	0.123801	0.126417	0.107236	0.109852	0.103749	0.121186	0.106364	0.105493	0.116827	0.123801	0.100262	0.123801	0.0802092	0.138622	0.13252	0.122929	0.136879	0.136007	0.137751	0.14211	0.125545	0.0993897	0.092415	0.092415	0.092415	0.092415	0.087184	0.0906713	0.0915432	0.129904	0.0793374	0.131648	0.0671316
51	Thyropygus uncinatus Pn	0.155187	0.159547	0.167393	0.155187	0.112467	0.113339	0.121186	0.124673	0.129032	0.136007	0.120314	0.131648	0.123801	0.114211	0.124673	0.115083	0.124673	0.0959024	0.0985179	0.102877	0.113339	0.0950305	0.097646	0.116827	0.126417	0.0959024	0.119442	0.0854403	0.129904	0.129032	0.11857	0.130776	0.129904	0.135135	0.134263	0.115083	0.0950305	0.0993897	0.097646	0.097646	0.0950305	0.0950305	0.092415	0.0967742	0.120314	0.0863121	0.136007	0.0723627
52	Thyropygus uncinatus Ps	0.155187	0.156059	0.176983	0.16129	0.121186	0.122058	0.124673	0.124673	0.122929	0.142982	0.129032	0.136879	0.123801	0.127289	0.121186	0.121186	0.129904	0.105493	0.108108	0.103749	0.123801	0.105493	0.102005	0.119442	0.125545	0.10898	0.11857	0.0889276	0.137751	0.136007	0.124673	0.136007	0.135135	0.131648	0.138622	0.129904	0.0959024	0.0950305	0.0950305	0.0950305	0.0906713	0.0897995	0.0889276	0.0941587	0.129904	0.0767219	0.134263	0.0383609
53	Thyropygus uncinatus Rcb	0.149085	0.146469	0.171752	0.158675	0.109852	0.110724	0.125545	0.122058	0.125545	0.141238	0.133391	0.139494	0.130776	0.133391	0.125545	0.125545	0.130776	0.0959024	0.102877	0.0993897	0.115083	0.0950305	0.0950305	0.124673	0.129032	0.107236	0.121186	0.0845684	0.137751	0.138622	0.13252	0.13252	0.131648	0.12816	0.136879	0.134263	0.0941587	0.097646	0.097646	0.097646	0.0906713	0.0959024	0.0854403	0.0967742	0.136007	0.0810811	0.130776	0.00348736
54	Thyropygus uncinatus Sc	0.155187	0.1517	0.177855	0.156931	0.121186	0.122058	0.125545	0.12816	0.121186	0.140366	0.126417	0.135135	0.123801	0.125545	0.119442	0.122929	0.129904	0.104621	0.104621	0.101133	0.121186	0.105493	0.0985179	0.114211	0.127289	0.104621	0.116827	0.0880558	0.135135	0.135135	0.122929	0.136007	0.135135	0.131648	0.135135	0.12816	0.0985179	0.0906713	0.0906713	0.0906713	0.0915432	0.0915432	0.0880558	0.0897995	0.12816	0.0749782	0.135135	0.0409765
55	Thyropygus uncinatus Sm	0.152572	0.153444	0.173496	0.154316	0.112467	0.113339	0.126417	0.117698	0.122058	0.139494	0.133391	0.13252	0.12816	0.130776	0.120314	0.127289	0.127289	0.0932868	0.0993897	0.0967742	0.109852	0.0941587	0.0932868	0.121186	0.129032	0.104621	0.119442	0.0889276	0.136879	0.138622	0.133391	0.134263	0.133391	0.130776	0.131648	0.131648	0.0959024	0.0932868	0.0932868	0.0932868	0.0880558	0.0932868	0.0810811	0.0941587	0.13252	0.0767219	0.129904	0.0148213
56	Thyropygus uncinatus Sn	0.152572	0.154316	0.17524	0.156059	0.111595	0.112467	0.12816	0.126417	0.119442	0.139494	0.136879	0.131648	0.126417	0.133391	0.121186	0.127289	0.130776	0.102005	0.105493	0.0993897	0.115955	0.100262	0.0959024	0.120314	0.129032	0.102005	0.121186	0.0897995	0.141238	0.136007	0.13252	0.13252	0.131648	0.129904	0.129904	0.13252	0.0915432	0.0932868	0.0932868	0.0932868	0.0889276	0.0932868	0.0845684	0.0941587	0.135135	0.0741064	0.136007	0.0278989
57	Thyropygus undulatus Pb2	0.168265	0.171752	0.174368	0.183958	0.13252	0.133391	0.087184	0.10898	0.129904	0.0836966	0.0897995	0.016565	0.0906713	0.0889276	0.0366173	0.138622	0.129904	0.133391	0.143854	0.136879	0.137751	0.127289	0.136879	0.117698	0.131648	0.139494	0.114211	0.131648	0.0897995	0.113339	0.101133	0.0627724	0.0610288	0.0627724	0.00959024	0.0880558	0.131648	0.133391	0.133391	0.133391	0.129904	0.127289	0.123801	0.133391	0.092415	0.127289	0.126417	0.135135
58	Thyropygus ursus LTK	0.173496	0.168265	0.174368	0.171752	0.131648	0.13252	0.0401046	0.0993897	0.109852	0.0932868	0.0322581	0.0889276	0.0531822	0.0287707	0.0802092	0.125545	0.110724	0.115083	0.119442	0.114211	0.126417	0.115083	0.116827	0.0993897	0.123801	0.121186	0.0906713	0.107236	0.0557977	0.0897995	0.0967742	0.0775937	0.0784656	0.0802092	0.087184	0.0174368	0.120314	0.115083	0.116827	0.116827	0.113339	0.110724	0.117698	0.116827	0.0374891	0.124673	0.109852	0.130776
[truncated: 10 more columns]

## Sheet: Caption
Table. Estimates of Evolutionary Divergence between Sequences
The number of base differences per site from between sequences are shown. This analysis involved 58 nucleotide sequences. All ambiguous positions were removed for each sequence pair (pairwise deletion option). There were a total of 1147 positions in the final dataset. Evolutionary analyses were conducted in MEGA11 [1]
1. Tamura K., Stecher G., and Kumar S. (2021). MEGA 11: Molecular Evolutionary Genetics Analysis Version 11. Molecular Biology and Evolution https://doi.org/10.1093/molbev/msab120.
Disclaimer: Although utmost care has been taken to ensure the correctness of the caption, the caption text is provided "as is" without any warranty of any kind. Authors advise the user to carefully check the caption prior to its use for any purpose and report any errors or problems to the authors immediately (www.megasoftware.net). In no event shall the authors and their employers be liable for a…
